# Supplementary material for: Adaptation of reach action to a novel force-field is not predicted by acuity of dynamic proprioception in either older or younger adults
Source: PubMed Central journal article supplement (PMC7936968; doi:10.1007/s00221-020-05997-3), 2020-12-14
Supplement: 221_2020_5997_MOESM1_ESM.pdf [file 221_2020_5997_MOESM1_ESM.pdf]

**Supplementary Material for:**

***Adaptation of reach action to a novel force-field is not predicted by acuity of dynamic proprioception in either older or younger adults***

**Authors: Nick M. Kitchen<sup>1,2\*</sup>, R Chris Miall<sup>1</sup>**

<sup>1</sup>School of Psychology, University of Birmingham, Birmingham, UK.

<sup>2</sup>Dept. of Speech & Hearing Science, University of Washington, Seattle, WA, USA.

**Email for correspondence: [nickkitchen1@gmail.com](mailto:nickkitchen1@gmail.com)**

## 1. Extended Analysis of Force-Field Adaptation Kinematics

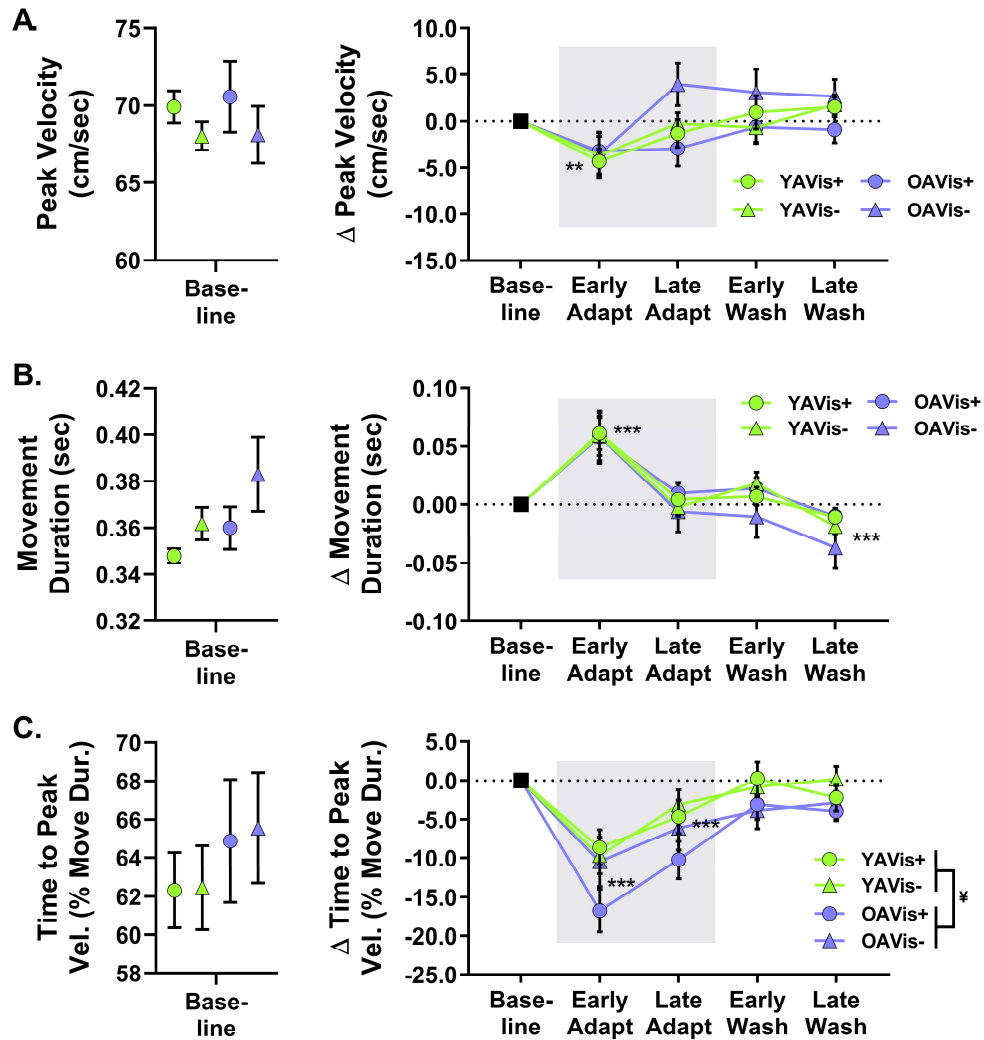

**Figure S1.** – Group average ( $\pm$  1SE) kinematic data for the force-field adaptation task across different phases of the experiment. All data is normalized to baseline (late null) performance which is shown in the left of each panel. **A.** shows the peak velocity data, **B.** shows the movement duration and **C.** shows the time to peak velocity represented as a percentage of total movement duration. Significant differences between phases is shown as \*\* ( $p_{adj} < 0.01$ ), \*\*\* ( $p_{adj} < 0.001$ ) and effect of age group indicated by ‡ ( $p < 0.05$ ).

**Normalized peak velocity** – There was an effect of phase on normalised peak velocity ( $F[2.5, 152.5] = 10.0, p < 0.001, \eta^2_p = 0.14$ ) with follow-up comparisons indicating that peak velocity dropped in early adaptation compared to all other phases (all  $t[64] \geq 3.21, p_{adj} \leq 0.005$  – Figure S1-A). There were no two- or three-way interactions of phase (all  $p > 0.262$ ), as well as no effects or interactions of vision and age group on normalised peak velocity (all  $p > 0.180$ ).

**Normalized movement duration** – There was also an effect of phase on normalised movement duration ( $F[1.9, 117.1] = 35.6, p < 0.001, \eta^2_p = 0.36$ ) where movement duration increased in early adaptation compared to all other phases (all  $t[66] \geq 5.40, p_{adj} < 0.001$ ), but was similar from late adaptation to early washout ( $t[66] = -1.0, p_{adj} = 0.319$ ), and then finally reduced in late washout compared to all other phases (all  $t[66] \geq 3.85, p_{adj} < 0.001$  – Figure S1-B). The two- and three-way interactions of phase were not significant (all  $p > 0.588$ ), and there were no effects or interactions of vis and age group (all  $p > 0.318$ ).

**Normalized time to peak velocity** – There was an effect of phase on normalised time to peak velocity (TPV –  $F[2.4, 152.8] = 28.6, p < 0.001, \eta^2_p = 0.31$ ), where TPV dropped to its shortest in early adaptation ( $t[67] \geq 3.85, p_{adj} < 0.001$  compared to all other phases), recovered towards baseline by late adaptation (all  $t[67] \geq 3.85, p_{adj} < 0.001$  compared to other phases) and then remained stable at near baseline levels during washout (early vs late washout;  $t[67] = 0.38, p_{adj} = 0.703$  – Figure S1-C). However, there were no two- or three-way phase interactions on normalised TPV (all  $p > 0.274$ ). There was no between-subjects effect of vis group on normalised TPV ( $F[1, 64] = 0.87, p = 0.354$ ), however there was an effect of age group on TPV ( $F[1, 64] = 4.6, p = 0.036, \eta^2_p = 0.07$ ) where overall, older adults reduced their TPV relative to baseline (and hence reached peak velocity earlier in their movements) more than younger adults. The vis group x age group interaction was not significant ( $F[1, 64] = 0.43, p = 0.511$ ).

## 2. Proprioception and Force-Field Adaptation Correlation Tables

### BL Uncertainty Range vs. Adaptation

#### PVLD

| Group   |      | Early    |          |                        |                        | Late     |          |                        |                        |
|---------|------|----------|----------|------------------------|------------------------|----------|----------|------------------------|------------------------|
|         |      | <i>r</i> | <i>p</i> | <i>p<sub>fdr</sub></i> | <i>BF<sub>01</sub></i> | <i>r</i> | <i>p</i> | <i>p<sub>fdr</sub></i> | <i>BF<sub>01</sub></i> |
| Older   | Vis+ | 0.341    | 0.196    | 0.556                  | 1.497                  | 0.113    | 0.689    | 0.982                  | 2.918                  |
|         | Vis- | -0.006   | 0.982    | 0.982                  | 3.241                  | -0.071   | 0.785    | 0.982                  | 3.226                  |
| Younger | Vis+ | -0.355   | 0.162    | 0.556                  | 1.346                  | -0.042   | 0.879    | 0.982                  | 3.207                  |
|         | Vis- | -0.086   | 0.742    | 0.982                  | 3.174                  | -0.332   | 0.209    | 0.556                  | 1.562                  |

#### Adaptation Index

| Group   |      | Early    |          |                        |                        | Late     |          |                        |                        |
|---------|------|----------|----------|------------------------|------------------------|----------|----------|------------------------|------------------------|
|         |      | <i>r</i> | <i>p</i> | <i>p<sub>fdr</sub></i> | <i>BF<sub>01</sub></i> | <i>r</i> | <i>p</i> | <i>p<sub>fdr</sub></i> | <i>BF<sub>01</sub></i> |
| Older   | Vis+ | -0.363   | 0.167    | 0.462                  | 1.341                  | -0.473   | 0.075    | 0.462                  | 0.734                  |
|         | Vis- | 0.026    | 0.920    | 0.920                  | 3.323                  | 0.217    | 0.404    | 0.462                  | 2.416                  |
| Younger | Vis+ | 0.266    | 0.319    | 0.462                  | 2.070                  | 0.296    | 0.249    | 0.462                  | 1.802                  |
|         | Vis- | 0.230    | 0.375    | 0.462                  | 2.317                  | 0.322    | 0.224    | 0.462                  | 1.639                  |

**Table S1.** – Group correlations between baseline (BL) uncertainty range and performance early and late adaptation block, as measured separately by peak-velocity lateral deviation (PVLD) and adaptation index. Correlation coefficients (*r*) are provided alongside raw (*p*) and false discovery rate-adjusted (*p<sub>fdr</sub>*) *p*-values. Bayes factor for correlation indicates increasing likelihood for null as *BF<sub>01</sub>* increases from 1 and increasing likelihood for alternative as *BF<sub>01</sub>* decreases from 1 (see main text for further details).

### **BL Absolute Bias vs. Adaptation**

#### **PVLD**

| Group   | Early    |          |                        |                        | Late     |          |                        |                        |       |
|---------|----------|----------|------------------------|------------------------|----------|----------|------------------------|------------------------|-------|
|         | <i>r</i> | <i>p</i> | <i>p<sub>fdr</sub></i> | <i>BF<sub>01</sub></i> | <i>r</i> | <i>p</i> | <i>p<sub>fdr</sub></i> | <i>BF<sub>01</sub></i> |       |
| Older   | Vis+     | -0.131   | 0.616                  | 0.821                  | 2.970    | -0.202   | 0.454                  | 0.726                  | 2.500 |
|         | Vis-     | 0.299    | 0.261                  | 0.726                  | 1.808    | 0.443    | 0.075                  | 0.598                  | 0.767 |
| Younger | Vis+     | -0.199   | 0.444                  | 0.726                  | 2.545    | -0.044   | 0.871                  | 0.918                  | 3.202 |
|         | Vis-     | 0.277    | 0.282                  | 0.726                  | 1.951    | 0.027    | 0.918                  | 0.918                  | 3.322 |

#### **Adaptation Index**

| Group   | Early    |          |                        |                        | Late     |          |                        |                        |       |
|---------|----------|----------|------------------------|------------------------|----------|----------|------------------------|------------------------|-------|
|         | <i>r</i> | <i>p</i> | <i>p<sub>fdr</sub></i> | <i>BF<sub>01</sub></i> | <i>r</i> | <i>p</i> | <i>p<sub>fdr</sub></i> | <i>BF<sub>01</sub></i> |       |
| Older   | Vis+     | -0.017   | 0.949                  | 0.999                  | 3.332    | -0.191   | 0.478                  | 0.765                  | 2.568 |
|         | Vis-     | -0.272   | 0.290                  | 0.581                  | 1.988    | -0.478   | 0.052                  | 0.211                  | 0.586 |
| Younger | Vis+     | 0.492    | 0.053                  | 0.211                  | 0.575    | < 0.001  | 0.999                  | 0.999                  | 3.336 |
|         | Vis-     | -0.321   | 0.209                  | 0.556                  | 1.604    | -0.146   | 0.576                  | 0.767                  | 2.886 |

**Table S2.** – Group correlations between baseline (BL) absolute bias and performance early and late adaptation block, measured separately by peak-velocity lateral deviation (PVLD) and adaptation index. Correlation coefficients (*r*) are provided alongside raw (*p*) and false discovery rate-adjusted (*p<sub>fdr</sub>*) *p*-values. Bayes factor for correlation indicates increasing likelihood for null as *BF<sub>01</sub>* increases from 1 and increasing likelihood for alternative as *BF<sub>01</sub>* decreases from 1 (see main text for further details).

### **Adaptation Extent vs. Bias Shift**

| Group   | PVLD     |          |                        |                        |       |
|---------|----------|----------|------------------------|------------------------|-------|
|         | <i>r</i> | <i>p</i> | <i>p<sub>fdr</sub></i> | <i>BF<sub>01</sub></i> |       |
| Older   | Vis+     | 0.255    | 0.340                  | 0.679                  | 2.127 |
|         | Vis-     | 0.386    | 0.126                  | 0.505                  | 1.131 |
| Younger | Vis+     | 0.009    | 0.973                  | 0.998                  | 3.240 |
|         | Vis-     | 0.001    | 0.998                  | 0.998                  | 3.339 |

  

| Group   | Adaptation Index |          |                        |                        |       |
|---------|------------------|----------|------------------------|------------------------|-------|
|         | <i>r</i>         | <i>p</i> | <i>p<sub>fdr</sub></i> | <i>BF<sub>01</sub></i> |       |
| Older   | Vis+             | -0.354   | 0.163                  | 0.326                  | 1.355 |
|         | Vis-             | 0.462    | 0.071                  | 0.285                  | 0.724 |
| Younger | Vis+             | -0.142   | 0.600                  | 0.661                  | 2.854 |
|         | Vis-             | 0.115    | 0.661                  | 0.661                  | 3.054 |

**Table S3.** – Group correlations between adaptation extent and proprioceptive recalibration (bias shift) across the adaptation block. Adaptation extent is measured separately by peak-velocity lateral deviation (PVLD) and adaptation index. Correlation coefficients (*r*) are provided alongside raw (*p*) and false discovery rate-adjusted (*p<sub>fdr</sub>*) *p*-values. Bayes factor for correlation indicates increasing likelihood for null as *BF<sub>01</sub>* increases from 1 and increasing likelihood for alternative as *BF<sub>01</sub>* decreases from 1 (see main text for further details). In all cases, positive correlations indicate greater adaptation was associated with greater shifts in the direction of the perturbing force-field.

### 3. Age Effects and Correlations of Spatial Working Memory Capacity

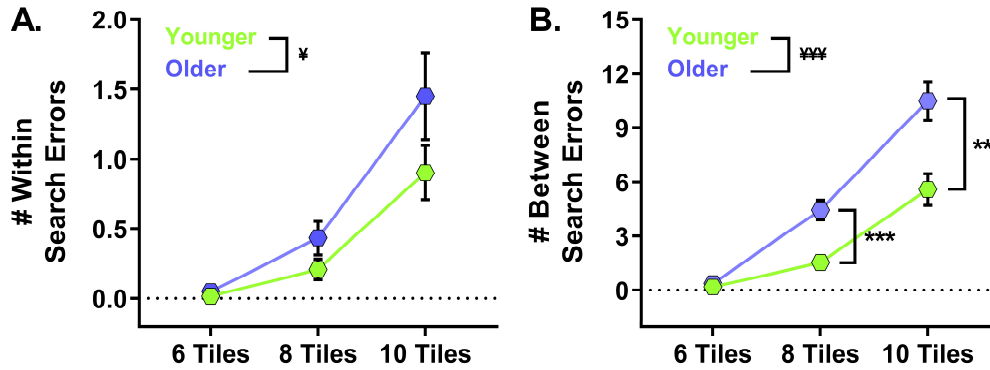

**Figure S2.** – Group average ( $\pm$  1SE) search errors for older (purple) and younger (green) adults in the spatial working memory task, where task difficulty increased with number of tiles. **A.** Number of within search errors, where main effect of age is indicated by  $^{\ast}$  ( $p < 0.05$ ). **B.** Between search errors, where main effect of age is indicated by  $^{\ast\ast\ast}$  ( $p < 0.001$ ) and significant post-hoc comparisons of older and younger adults are indicated by  $^{\ast\ast}$  ( $p_{adj} < 0.01$ ) and  $^{\ast\ast\ast}$  ( $p_{adj} < 0.001$ ).

#### Total SWM Search Errors vs. Adaptation

##### PVLD

| Group   |      | Early    |          |                        |                        | Late     |          |                        |                        |
|---------|------|----------|----------|------------------------|------------------------|----------|----------|------------------------|------------------------|
|         |      | <i>r</i> | <i>p</i> | <i>p<sub>fdr</sub></i> | <i>BF<sub>01</sub></i> | <i>r</i> | <i>p</i> | <i>p<sub>fdr</sub></i> | <i>BF<sub>01</sub></i> |
| Older   | Vis+ | -0.094   | 0.721    | 0.940                  | 3.146                  | 0.201    | 0.456    | 0.730                  | 2.509                  |
|         | Vis- | -0.232   | 0.386    | 0.730                  | 2.292                  | 0.032    | 0.902    | 0.940                  | 3.315                  |
| Younger | Vis+ | 0.460    | 0.063    | 0.384                  | 0.678                  | 0.260    | 0.331    | 0.730                  | 2.095                  |
|         | Vis- | 0.417    | 0.096    | 0.384                  | 0.925                  | 0.020    | 0.940    | 0.940                  | 3.330                  |

##### Adaptation Index

| Group   |      | Early    |          |                        |                        | Late                |          |                        |                        |
|---------|------|----------|----------|------------------------|------------------------|---------------------|----------|------------------------|------------------------|
|         |      | <i>r</i> | <i>p</i> | <i>p<sub>fdr</sub></i> | <i>BF<sub>01</sub></i> | <i>r</i>            | <i>p</i> | <i>p<sub>fdr</sub></i> | <i>BF<sub>01</sub></i> |
| Older   | Vis+ | -0.038   | 0.885    | 0.885                  | 3.306                  | -0.074              | 0.784    | 0.885                  | 3.131                  |
|         | Vis- | 0.076    | 0.772    | 0.885                  | 3.211                  | 0.211               | 0.417    | 0.885                  | 2.458                  |
| Younger | Vis+ | -0.345   | 0.191    | 0.763                  | 1.470                  | -0.494 <sup>†</sup> | 0.044    | 0.350                  | 0.509                  |
|         | Vis- | -0.102   | 0.696    | 0.885                  | 3.111                  | 0.159               | 0.542    | 0.885                  | 2.806                  |

**Table S4.** – Group correlations between total search errors in the spatial working memory (SWM) task and early and late performance in the adaptation block, measured separately by peak-velocity lateral deviation (PVLD) and adaptation index. Correlation coefficients (*r*) are provided alongside raw (*p*) and false discovery rate-adjusted (*p<sub>fdr</sub>*) *p*-values. Significant correlations that did not survive corrections for multiple comparisons indicated by <sup>†</sup>. Bayes factor for correlation indicates increasing likelihood for null as *BF<sub>01</sub>* increases from 1 and increasing likelihood for alternative as *BF<sub>01</sub>* decreases from 1 (see main text for further details).

**Total SWM Search Errors vs. Washout**

**PVLD**

| Group   |      | Early    |          |                        |                        | Late     |          |                        |                        |
|---------|------|----------|----------|------------------------|------------------------|----------|----------|------------------------|------------------------|
|         |      | <i>r</i> | <i>p</i> | <i>p<sub>fdr</sub></i> | <i>BF<sub>01</sub></i> | <i>r</i> | <i>p</i> | <i>p<sub>fdr</sub></i> | <i>BF<sub>01</sub></i> |
| Older   | Vis+ | -0.196   | 0.452    | 0.755                  | 2.567                  | -0.265   | 0.303    | 0.755                  | 2.042                  |
|         | Vis- | -0.066   | 0.802    | 0.917                  | 3.243                  | -0.155   | 0.566    | 0.755                  | 2.785                  |
| Younger | Vis+ | 0.016    | 0.950    | 0.950                  | 3.332                  | -0.180   | 0.489    | 0.755                  | 2.672                  |
|         | Vis- | -0.333   | 0.192    | 0.755                  | 1.516                  | -0.170   | 0.500    | 0.755                  | 2.778                  |

**Adaptation Index**

| Group   |      | Early              |          |                        |                        | Late     |          |                        |                        |
|---------|------|--------------------|----------|------------------------|------------------------|----------|----------|------------------------|------------------------|
|         |      | <i>r</i>           | <i>p</i> | <i>p<sub>fdr</sub></i> | <i>BF<sub>01</sub></i> | <i>r</i> | <i>p</i> | <i>p<sub>fdr</sub></i> | <i>BF<sub>01</sub></i> |
| Older   | Vis+ | -0.132             | 0.614    | 0.702                  | 2.966                  | 0.274    | 0.286    | 0.573                  | 1.971                  |
|         | Vis- | 0.366              | 0.148    | 0.573                  | 1.269                  | 0.170    | 0.544    | 0.702                  | 2.651                  |
| Younger | Vis+ | -0.283             | 0.271    | 0.573                  | 1.903                  | 0.014    | 0.957    | 0.957                  | 3.334                  |
|         | Vis- | 0.492 <sup>†</sup> | 0.045    | 0.360                  | 0.520                  | 0.222    | 0.392    | 0.627                  | 2.375                  |

**Table S5.** – Group correlations between total search errors in the spatial working memory (SWM) task and early and late performance in the washout block, measured separately by peak-velocity lateral deviation (PVLD) and adaptation index. Correlation coefficients (*r*) are provided alongside raw (*p*) and false discovery rate-adjusted (*p<sub>fdr</sub>*) *p*-values. Significant correlations that did not survive corrections for multiple comparisons indicated by <sup>†</sup>. Bayes factor for correlation indicates increasing likelihood for null as *BF<sub>01</sub>* increases from 1 and increasing likelihood for alternative as *BF<sub>01</sub>* decreases from 1 (see main text for further details).
